# Supplementary material for: Exploring the Climate Temperature Effects on Settlement Intentions of Older Migrants: Evidence from China
Source: MDPI journal article supplement (doi:10.3390/ijerph19084896), 2022-04-18
Supplement: s1 [file s1]

## Supplementary Material

**Table S1.** Odds ratio and its upper and lower limits in logistic model.

| Variable                                    | Model 1: Cold effect |       |       | Model 2: Heat effect |       |       | Model 3: Temperature gap effect |              |              | Model 4: Temperature zone effect |       |       |
|---------------------------------------------|----------------------|-------|-------|----------------------|-------|-------|---------------------------------|--------------|--------------|----------------------------------|-------|-------|
|                                             | OR                   | -     | +     | OR                   | -     | +     | OR                              | -            | +            | OR                               | -     | +     |
| <b>Dependent variable</b>                   |                      |       |       |                      |       |       |                                 |              |              |                                  |       |       |
| Settlement intention of the older migrants. |                      |       |       |                      |       |       |                                 |              |              |                                  |       |       |
| <b>Key independent variables</b>            |                      |       |       |                      |       |       |                                 |              |              |                                  |       |       |
| SI                                          |                      |       |       |                      |       |       |                                 |              |              |                                  |       |       |
| OCT (>0°C=reference)                        |                      |       |       |                      |       |       |                                 |              |              |                                  |       |       |
| <-10 °C                                     | <b>2.123***</b>      | 1.705 | 2.643 |                      |       |       |                                 |              |              |                                  |       |       |
| -10-0 °C                                    | 1.303***             | 1.072 | 1.585 |                      |       |       |                                 |              |              |                                  |       |       |
| DCT (<-10°C=reference)                      |                      |       |       |                      |       |       |                                 |              |              |                                  |       |       |
| <-10 °C                                     | 0.811                | 0.635 | 1.036 |                      |       |       |                                 |              |              |                                  |       |       |
| -10-0 °C                                    | 1.043                | 0.864 | 1.259 |                      |       |       |                                 |              |              |                                  |       |       |
| OHT (>28°C=reference)                       |                      |       |       |                      |       |       |                                 |              |              |                                  |       |       |
| <23°C                                       |                      |       |       | <b>2.029***</b>      | 1.561 | 2.636 |                                 |              |              |                                  |       |       |
| 23-28°C                                     |                      |       |       | 1.758***             | 1.437 | 2.152 |                                 |              |              |                                  |       |       |
| DHT (>28°C=reference)                       |                      |       |       |                      |       |       |                                 |              |              |                                  |       |       |
| <23°C                                       |                      |       |       | 1.082                | 0.828 | 1.413 |                                 |              |              |                                  |       |       |
| 23-28°C                                     |                      |       |       | 1.093                | 0.903 | 1.323 |                                 |              |              |                                  |       |       |
| GCT (<5°C=reference)                        |                      |       |       |                      |       |       | <b>1.681***</b>                 | <b>1.366</b> | <b>2.069</b> |                                  |       |       |
| GHT (<1°C=reference)                        |                      |       |       |                      |       |       | 1.158                           | 0.987        | 1.359        |                                  |       |       |
| Spanning (similar =reference)               |                      |       |       |                      |       |       |                                 |              |              |                                  |       |       |
| Adjacent                                    |                      |       |       |                      |       |       |                                 |              |              | <b>1.291***</b>                  | 1.100 | 1.518 |
| Non-adjacent                                |                      |       |       |                      |       |       |                                 |              |              | 1.056                            | 0.774 | 1.443 |
| <b>Control variables</b>                    |                      |       |       |                      |       |       |                                 |              |              |                                  |       |       |
| Gender (male=reference)                     | 0.93                 | 0.808 | 1.069 | 0.953                | 0.829 | 1.095 | 0.95                            | 0.827        | 1.092        | 0.955                            | 0.831 | 1.097 |
| Age (<70=reference)                         | 1.230**              | 1.037 | 1.460 | 1.218**              | 1.027 | 1.446 | 1.257***                        | 1.060        | 1.491        | 1.226**                          | 1.035 | 1.454 |

|                                |          |       |       |          |       |       |          |       |       |          |       |       |
|--------------------------------|----------|-------|-------|----------|-------|-------|----------|-------|-------|----------|-------|-------|
| Edu (primary =reference)       |          |       |       |          |       |       |          |       |       | ***      |       |       |
| High school                    | 1.112    | 0.956 | 1.292 | 1.164**  | 1.002 | 1.353 | 1.137*   | 0.979 | 1.321 | 1.135*   | 0.978 | 1.318 |
| College                        | 1.626*** | 1.205 | 2.194 | 1.703*** | 1.262 | 2.298 | 1.612*** | 1.196 | 2.173 | 1.616*** | 1.200 | 2.177 |
| Marriage (married=reference)   | 1.174*   | 0.975 | 1.414 | 1.165    | 0.968 | 1.402 | 1.171*   | 0.973 | 1.409 | 1.176*   | 0.978 | 1.414 |
| Hukou (agricultural=reference) | 1.546*** | 1.318 | 1.815 | 1.658*** | 1.414 | 1.943 | 1.594*** | 1.360 | 1.868 | 1.676*** | 1.432 | 1.962 |
| Health (healthy=reference)     | 1.278*** | 1.070 | 1.527 | 1.288*** | 1.079 | 1.537 | 1.331*** | 1.116 | 1.588 | 1.342*** | 1.125 | 1.601 |
| Exp/Income                     | 1.819*** | 1.386 | 2.387 | 1.877*** | 1.432 | 2.461 | 2.004*** | 1.530 | 2.623 | 1.97***  | 1.506 | 2.577 |
| Housing (non own=reference)    | 2.720*** | 2.369 | 3.124 | 2.733*** | 2.382 | 3.137 | 2.693*** | 2.348 | 3.089 | 2.697*** | 2.352 | 3.093 |
| Purposes (economic=reference)  | 1.654*** | 1.405 | 1.947 | 1.661*** | 1.412 | 1.954 | 1.657*** | 1.409 | 1.949 | 1.679*** | 1.429 | 1.974 |
| Time                           | 1.069*** | 1.059 | 1.079 | 1.070*** | 1.060 | 1.080 | 1.070*** | 1.060 | 1.080 | 1.069*** | 1.059 | 1.079 |
| Lnd                            | 0.895*** | 0.834 | 0.960 | 0.893*** | 0.832 | 0.957 | 0.816*** | 0.755 | 0.881 | 0.857*** | 0.787 | 0.934 |
| Size (small city=reference)    |          |       |       |          |       |       |          |       |       |          |       |       |
| Medium city                    | 0.655*** | 0.501 | 0.856 | 0.708**  | 0.543 | 0.923 | 0.613*** | 0.471 | 0.798 | 0.657*** | 0.506 | 0.853 |
| Large city                     | 0.609*** | 0.456 | 0.814 | 0.728**  | 0.541 | 0.980 | 0.558*** | 0.420 | 0.742 | 0.633*** | 0.479 | 0.837 |
| Megacity                       | 0.809    | 0.616 | 1.063 | 0.868    | 0.654 | 1.153 | 0.755**  | 0.577 | 0.986 | 0.811    | 0.621 | 1.059 |
| GDP                            | 1.012    | 0.992 | 1.032 | 1.022**  | 1.000 | 1.043 | 1.006    | 0.987 | 1.027 | 1.009    | 0.989 | 1.029 |
| Beds                           | 1.124*** | 1.061 | 1.190 | 1.076**  | 1.016 | 1.140 | 1.150*** | 1.086 | 1.217 | 1.114*** | 1.053 | 1.178 |

Notes: “-“ represents the lower limit of 95% CI, “+” represents the upper limit of 95% CI. \*  $p < 0.1$ , \*\*  $p < 0.05$ , \*\*\*  $p < 0.01$ .
